# Supplementary material
Source: Royal Society of Chemistry journal article supplement (doi:10.1039/d6fo00961a)

*Supplementary information*

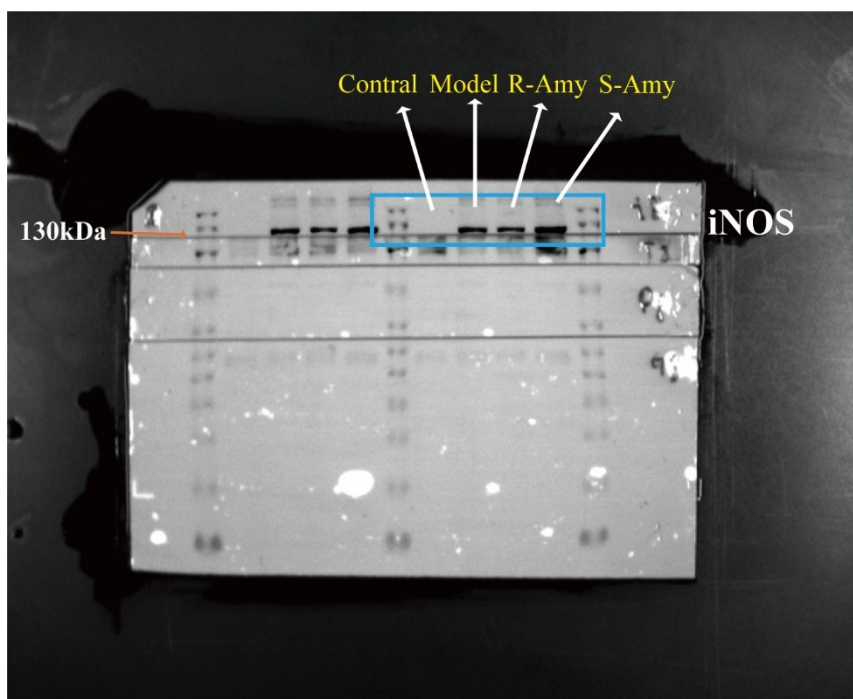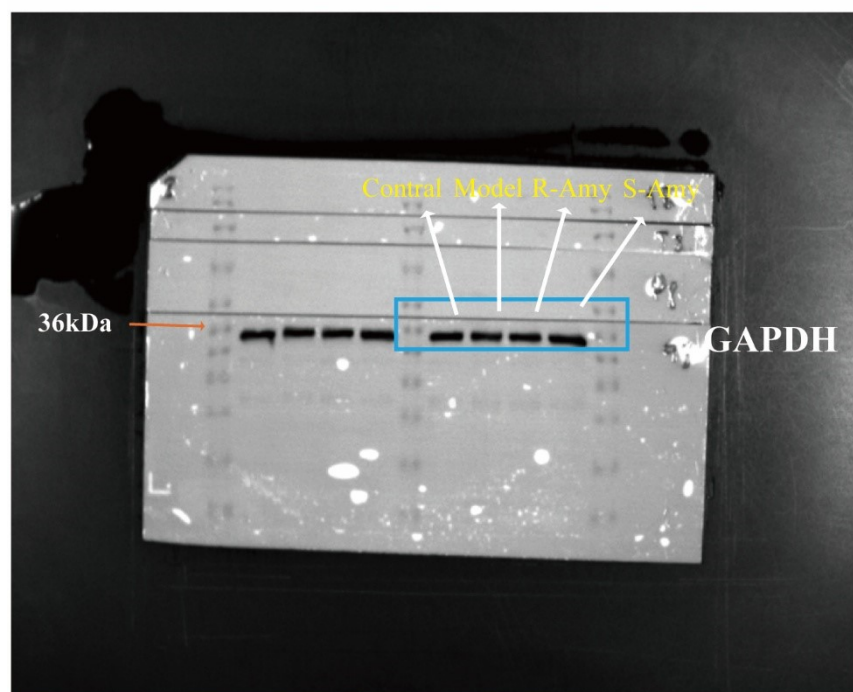

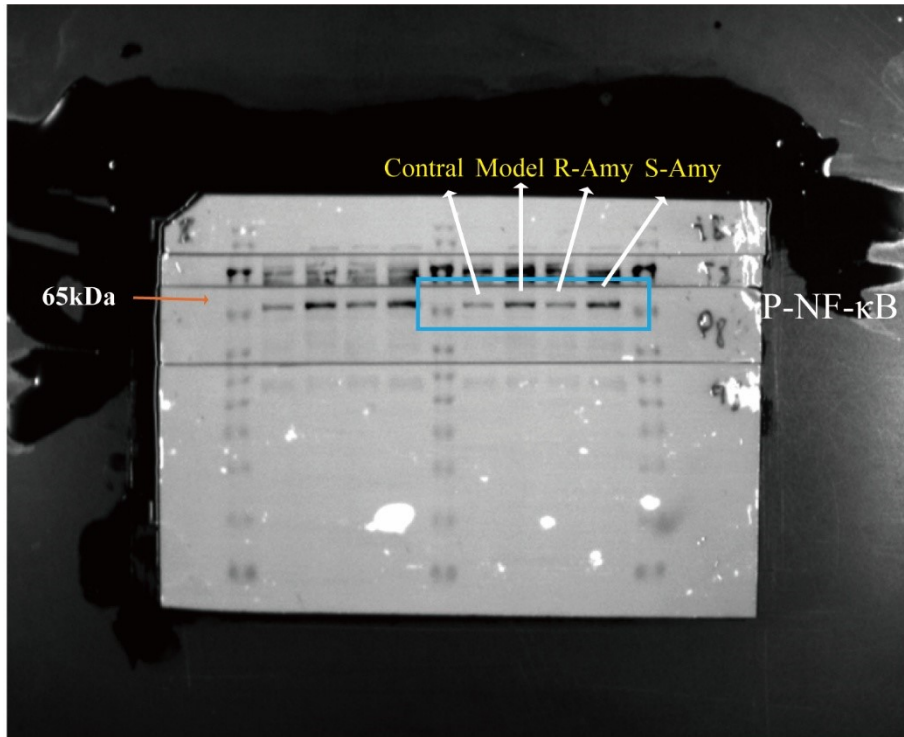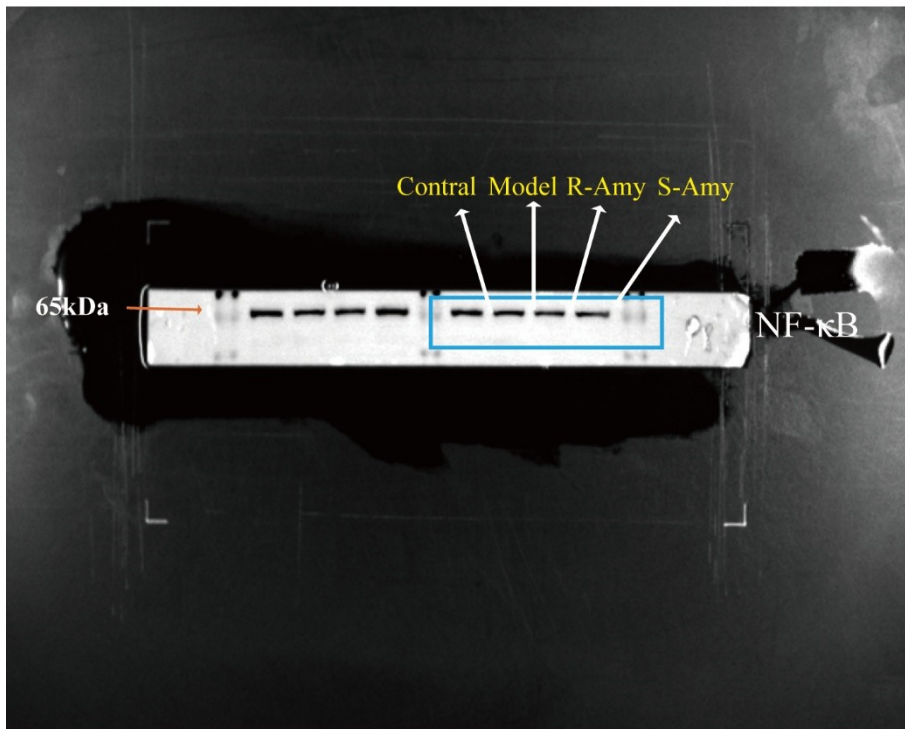

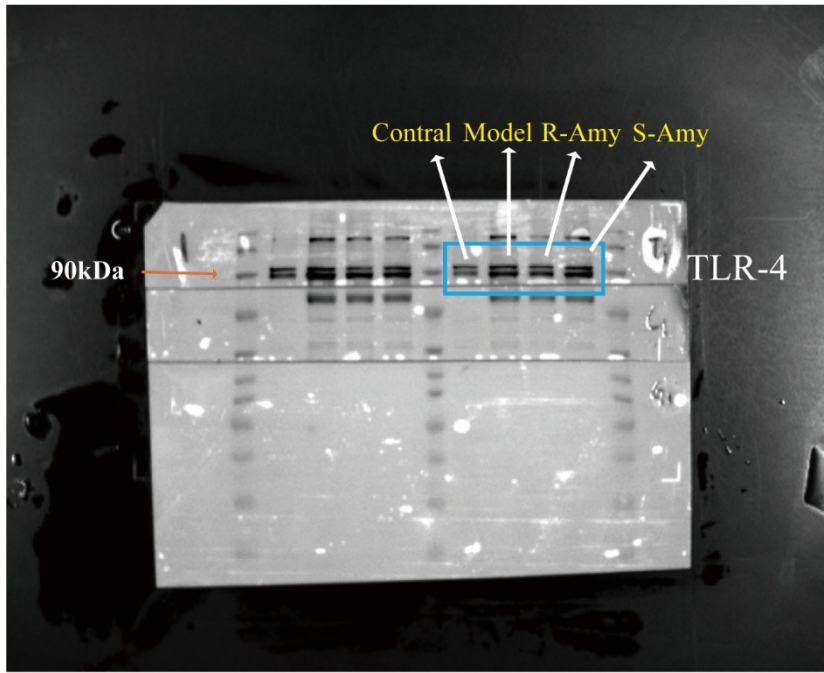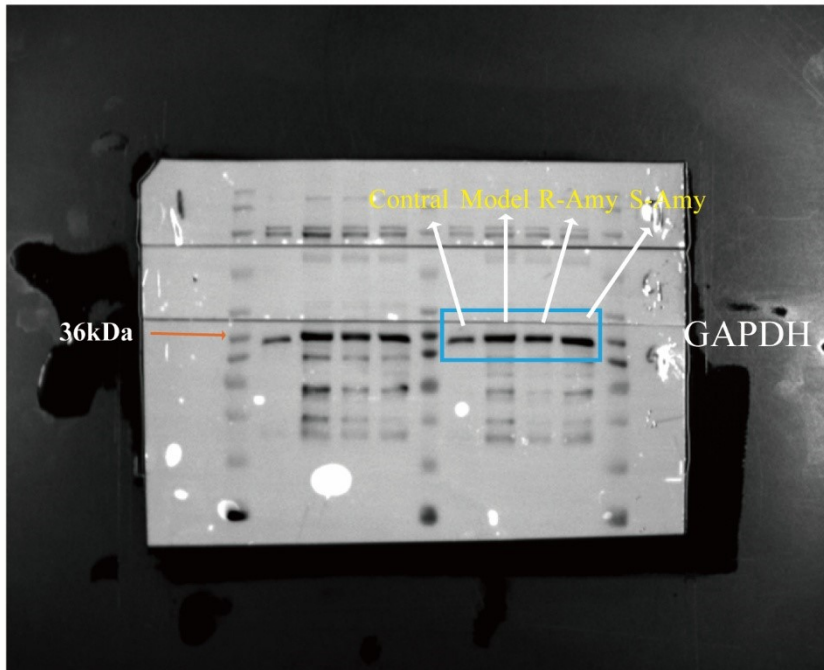

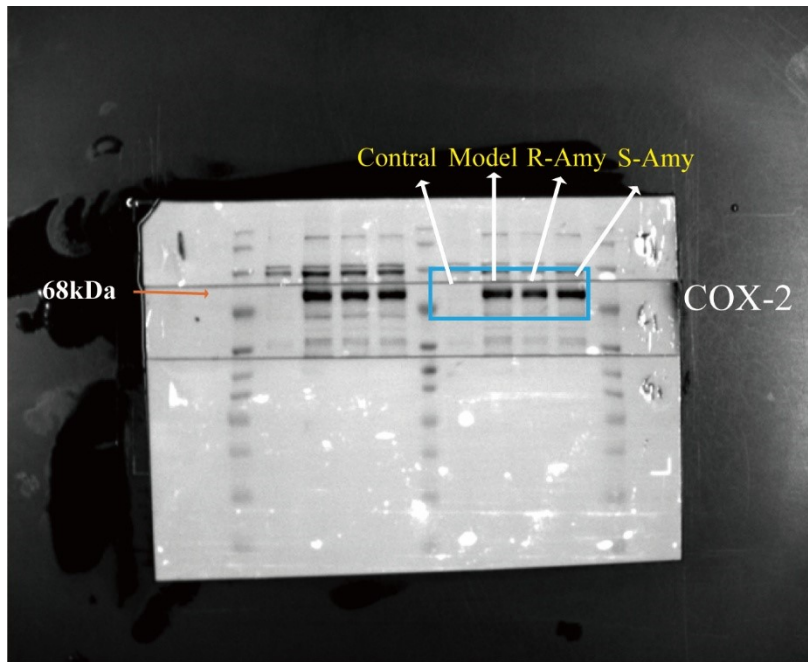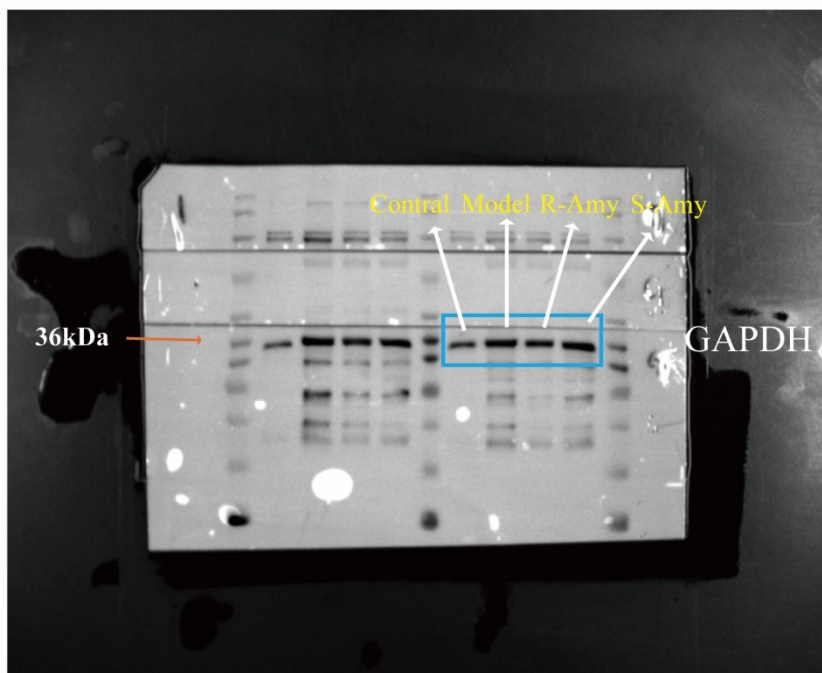

Supplement: d6fo00961a1.pdf [file d6fo00961a1.pdf]
